# Supplementary material for: Effects of Sodium Butyrate Supplementation in Milk on the Growth Performance and Intestinal Microbiota of Preweaning Holstein Calves
Source: MDPI journal article supplement (doi:10.3390/ani13132069), 2023-06-22
Supplement: s1 [file s1]

## Supplementary material – Tables and Figures

**Supplemental Table S1.** The growth performance, health scores, and incidence of diarrhea in Holstein preweaning calves aged 36–50 d that were fed different levels of sodium butyrate in milk.

| Items                    | Sodium butyrate supplement level (Trt, g/L) |                   |                   |                   | SEM   | <i>p</i> -value |        |           |        |        |           |
|--------------------------|---------------------------------------------|-------------------|-------------------|-------------------|-------|-----------------|--------|-----------|--------|--------|-----------|
|                          | 0 (0 g/d)                                   | 2 (17.6 g/d)      | 4 (35.2 g/d)      | 6 (52.8 g/d)      |       | ANOVA           | Linear | Quadratic | Trt    | Day    | Trt × Day |
| Initial BW, kg           | 59                                          | 59.08             | 60.6              | 58.25             | 2.57  | 0.93            | 0.64   | 0.59      | 0.84   | <0.001 | 0.99      |
| Final BW, kg             | 77.26                                       | 76.67             | 79.12             | 77.12             | 2.71  | 0.93            | 0.80   | 0.78      |        |        |           |
| ADG, g/d                 | 1074.12                                     | 1034.31           | 1089.41           | 1109.8            | 56.66 | 0.81            | 0.92   | 0.76      | –      | –      | –         |
| DMI, g/d                 | 382.04                                      | 335.28            | 351.6             | 402.64            | 23.8  | 0.20            | 0.64   | 0.59      | 0.13   | <0.001 | 0.92      |
| Feed efficiency          | 0.35                                        | 0.32              | 0.32              | 0.38              | 0.04  | 0.70            | 0.38   | 0.29      | –      | –      | –         |
| Ear score                | 1.07 <sup>c</sup>                           | 1.22 <sup>b</sup> | 1.37 <sup>a</sup> | 1.21 <sup>b</sup> | 0.04  | <0.001          | <0.001 | 0.001     | <0.001 | <0.001 | 0.21      |
| Eye score                | 1.30                                        | 1.26              | 1.33              | 1.22              | 0.04  | 0.096           | 0.92   | 0.51      | 0.10   | <0.001 | 0.42      |
| Nasal discharge score    | 1.37                                        | 1.36              | 1.47              | 1.31              | 0.07  | 0.43            | 0.32   | 0.27      | 0.47   | 0.22   | 0.90      |
| Fecal scores             | 2.32                                        | 2.16              | 2.43              | 2.44              | 0.07  | 0.099           | 0.49   | 0.18      | 0.066  | <0.001 | 0.80      |
| Incidence of diarrhea, % | 14.76                                       | 9.23              | 21.79             | 18.3              | 5.4   | 0.13            | 0.22   | 0.51      | 0.12   | 0.031  | 0.97      |

SEM = standard error of the means; *n* = 6 for each group; means within row with the different lowercase letters superscripts are significantly different (*p* < 0.05). BW = body weight; ADG = average daily gain; DMI = dry matter intake; Feed efficiency = DMI/ADG. All the calves fed with 8.8 L/d whole milk. Ear scores were (1) normal, (2) ear flick or head shake, (3) slight unilateral droop, and (4) head tilt or bilateral droop. Eye scores were (1) normal, (2) small amount of ocular discharge, (3) a moderate amount of bilateral discharge, and (4) heavy ocular discharge. Nasal discharge scores were (1) normal serous discharge, (2) small amount of unilateral cloudy discharge, (3) bilateral or cloudy (or both) or excessive mucus discharge, and (4) copious bilateral mucopurulent discharge. Fecal scores were established as (1) normal, (2) semi-formed, pasty, or both, (3) loose but stays on top of bedding, and (4) watery or sifts through the bedding, or both.

**Supplemental Table S2.** Ingredients and chemical compositions of the feed.

| Ingredient, of % DM <sup>1</sup>      |       | Chemical analysis (DM, %) |       |
|---------------------------------------|-------|---------------------------|-------|
| Corn                                  | 40.0  | Nutrients of % DM         | 88.30 |
| Wheat bran                            | 8.0   | Crude protein             | 23.61 |
| Distiller's dried grains with soluble | 5.0   | Ether extract             | 5.73  |
| Corn husk                             | 10.0  | Ash                       | 8.37  |
| Soybean meal                          | 16.0  | Neutral detergent fiber   | 21.67 |
| Cotton meal                           | 16.0  | NFC <sup>3</sup>          | 40.62 |
| Premix <sup>2</sup>                   | 5.0   | Acid detergent fiber      | 12.36 |
| Total                                 | 100.0 | Starch                    | 35.21 |

<sup>1</sup> DM = dry matter.

<sup>2</sup> Composition of premix per kilogram: pantothenic acid 200 mg; niacin acid 400 mg; folic acid 20 mg; biotin 3 mg; I 10 mg; Se 10 mg; Co 10 mg; Fe 5,000 mg; Cu 1,000 mg; Zn 2,000 mg; Mn 2,000 mg; vitamin A 300,000 IU; vitamin D 150,000 IU; vitamin E 280,000 IU; vitamin K 80 mg; vitamin B1 30 mg; vitamin B2 100 mg; vitamin B6 60 mg; vitamin B12 0.4 mg.

<sup>3</sup> Non-fiber carbohydrate (NFC) is calculated as  $100 - (\text{crude protein} + \text{ether extract} + \text{ash} + \text{neutral detergent fiber})$ .

**Supplemental Table S3.** Information on the sequencing depth for 16S rRNA genes.

| Sample ID | Total read bases (bp) | Clean reads    | Mean_length | Min_length | Max_length | Goods<br>-coverage |
|-----------|-----------------------|----------------|-------------|------------|------------|--------------------|
| WK2CON1   | 30345884              | 74557          | 407.015894  | 212        | 441        | 0.998935           |
| WK2CON2   | 20109665              | 49582          | 405.583982  | 231        | 471        | 0.99899            |
| WK2CON3   | 18967614              | 45632          | 415.664753  | 245        | 483        | 0.998401           |
| WK2CON4   | 22795915              | 54724          | 416.561563  | 216        | 479        | 0.999323           |
| WK2CON5   | 20370553              | 49205          | 413.993558  | 337        | 430        | 0.998217           |
| WK2CON6   | 21289619              | 52162          | 408.144224  | 252        | 439        | 0.998254           |
| WK2CON7   | 23175712              | 56608          | 409.40701   | 241        | 431        | 0.998668           |
| WK2CON8   | 24187359              | 58408          | 414.110379  | 228        | 522        | 0.998788           |
| WK2CON9   | 22119689              | 53923          | 410.208798  | 275        | 430        | 0.998594           |
| WK2CON10  | 22480269              | 54197          | 414.788069  | 231        | 454        | 0.998136           |
| WK2LSB1   | 29656798              | 71261          | 416.17151   | 212        | 464        | 0.996815           |
| WK2LSB2   | 21961995              | 52794          | 415.994147  | 210        | 490        | 0.998892           |
| WK2LSB3   | 21959993              | 52774          | 416.113863  | 265        | 431        | 0.999045           |
| WK2LSB4   | 20711183              | 50618          | 409.166364  | 246        | 499        | 0.998689           |
| WK2LSB5   | 21121475              | 50727          | 416.375402  | 246        | 464        | 0.998908           |
| WK2LSB6   | 24341721              | 58380          | 416.953083  | 259        | 464        | 0.998128           |
| WK2LSB7   | 19926977              | 47315          | 421.155595  | 212        | 442        | 0.998368           |
| WK2LSB8   | 22531348              | 53918          | 417.881746  | 270        | 490        | 0.999028           |
| WK2LSB9   | 23526633              | 56647          | 415.320017  | 239        | 477        | 0.998733           |
| WK2LSB10  | 20685532              | 49316          | 419.448698  | 270        | 441        | 0.996611           |
| WK2MSB1   | 21173912              | 51216          | 413.423774  | 225        | 441        | 0.998695           |
| WK2MSB2   | 30884239              | 73674          | 419.201333  | 232        | 432        | 0.998639           |
| WK2MSB3   | 25158768              | 60379          | 416.680766  | 327        | 431        | 0.998339           |
| WK2MSB4   | 23123059              | 55781          | 414.532888  | 330        | 431        | 0.998672           |
| WK2MSB5   | 20726880              | 50382          | 411.394546  | 216        | 431        | 0.99832            |
| WK2MSB6   | 22468769              | 53537          | 419.68674   | 266        | 478        | 0.997783           |
| WK2MSB7   | 20067903              | 47681          | 420.8784    | 216        | 441        | 0.995408           |
| WK2MSB8   | 21296019              | 51186          | 416.051635  | 252        | 435        | 0.998154           |
| WK2MSB9   | 24351273              | 58860          | 413.715138  | 270        | 490        | 0.998639           |
| WK2MSB10  | 18934503              | 45164          | 419.238841  | 216        | 450        | 0.998356           |
| WK2HSB1   | 30167901              | 73756          | 409.023008  | 230        | 464        | 0.998895           |
| WK2HSB2   | 27378256              | 65386          | 418.717401  | 220        | 492        | 0.998393           |
| WK2HSB3   | 22348917              | 53863          | 414.921505  | 228        | 446        | 0.998123           |
| WK2HSB4   | 23899837              | 57578          | 415.086266  | 216        | 431        | 0.998777           |
| WK2HSB5   | 19838684              | 48479          | 409.22222   | 216        | 430        | 0.998072           |
| WK2HSB6   | 23605076              | 56533          | 417.54508   | 215        | 478        | 0.998894           |
| WK2HSB7   | 16593022              | 40074          | 414.05954   | 238        | 432        | 0.998475           |
| WK2HSB8   | 22620472              | 54219          | 417.205629  | 252        | 431        | 0.99814            |
| WK2HSB9   | 22380013              | 53484          | 418.443142  | 301        | 465        | 0.996356           |
| WK2HSB10  | 20632399              | 50547          | 408.182464  | 337        | 433        | 0.998558           |
| Summation |                       | <b>2194527</b> |             |            |            |                    |
| Average   | 22747895.9            | 54863.175      | 414.6817243 | 247.5      | 455.1      | 0.997141225        |

**Supplemental Table S4.** Effects of sodium butyrate supplementation on the taxonomic analysis of the intestinal microbiota at the phylum and genus levels in preweaning calves.

| Relative abundance, %                   | Supplementation level, g/d |        |        |        | SEM    | p-Value |        |           |
|-----------------------------------------|----------------------------|--------|--------|--------|--------|---------|--------|-----------|
|                                         | 0                          | 4.4    | 8.8    | 17.6   |        | ANOVA   | Linear | Quadratic |
| Phylum level                            |                            |        |        |        |        |         |        |           |
| <i>Firmicutes</i>                       | 72.187                     | 73.529 | 63.716 | 81.499 | 4.7837 | 0.092   | 0.17   | 0.078     |
| <i>Actinobacteriota</i>                 | 10.732                     | 7.236  | 7.408  | 9.312  | 2.9348 | 0.81    | 0.35   | 0.36      |
| <i>Proteobacteria</i>                   | 0.4086                     | 0.9615 | 1.2052 | 0.9325 | 0.5014 | 0.72    | 0.27   | 0.34      |
| Genus level                             |                            |        |        |        |        |         |        |           |
| <i>Blautia</i>                          | 18.182                     | 11.861 | 10.488 | 18.472 | 3.59   | 0.27    | 0.074  | 0.052     |
| <i>Faecalibacterium</i>                 | 13.60                      | 9.24   | 6.24   | 5.34   | 0.77   | 0.30    | 0.19   | 0.39      |
| <i>Bacteroides</i>                      | 7.187                      | 10.122 | 8.700  | 4.646  | 2.96   | 0.6     | 0.47   | 0.32      |
| <i>Alloprevotella</i>                   | 3.157                      | 4.448  | 8.457  | 1.773  | 2.925  | 0.42    | 0.18   | 0.14      |
| <i>Collinsella</i>                      | 6.808                      | 1.698  | 2.267  | 5.718  | 2.260  | 0.31    | 0.086  | 0.073     |
| <i>Unclassified_f__Lachnospiraceae</i>  | 3.994                      | 4.495  | 1.433  | 5.321  | 1.314  | 0.2     | 0.2    | 0.14      |
| <i>Subdoligranulum</i>                  | 5.112                      | 1.068  | 4.518  | 2.624  | 1.3124 | 0.14    | 0.51   | 0.62      |
| <i>Norank_f__norank_o__Clostridia_U</i> | 1.449                      | 3.698  | 5.516  | 2.2    | 1.609  | 0.31    | 0.065  | 0.063     |
| CG-014                                  |                            |        |        |        |        |         |        |           |
| <i>Bifidobacterium</i>                  | 2.887                      | 4.348  | 1.884  | 2.754  | 1.4025 | 0.66    | 0.85   | 0.93      |
| <i>Ruminococcus_torques_group</i>       | 4.852                      | 1.581  | 3.093  | 2.032  | 1.5724 | 0.47    | 0.37   | 0.51      |
| <i>Enterococcus</i>                     | 4.101                      | 0.128  | 1.042  | 0.883  | 0.611  | 0.098   | 0.054  | 0.106     |
| <i>Ruminococcus_gnavus_group</i>        | 0.341                      | 0.556  | 0.208  | 0.480  | 0.055  | 0.114   | 0.605  | 0.522     |
| <i>Prevotella</i>                       | 0.804                      | 0.753  | 2.342  | 0.419  | 0.361  | 0.241   | 0.154  | 0.124     |
| <i>Phascolarctobacterium</i>            | 0.215                      | 2.605  | 0.618  | 0.719  | 0.362  | 0.084   | 0.316  | 0.265     |
| <i>Dorea</i>                            | 1.138                      | 0.234  | 0.305  | 0.685  | 0.174  | 0.24    | 0.055  | 0.065     |
| <i>Slackia</i>                          | 0.707                      | 0.147  | 1.248  | 0.225  | 0.219  | 0.26    | 0.506  | 0.42      |
| <i>Tyzzarella</i>                       | 1.079                      | 0.588  | 0.333  | 0.292  | 0.144  | 0.19    | 0.106  | 0.252     |
| <i>Butyricicoccus</i>                   | 0.170                      | 1.095  | 0.444  | 0.355  | 0.140  | 0.097   | 0.20   | 0.161     |
| <i>Syntrophococcus</i>                  | 0.027                      | 0.075  | 1.680  | 0.025  | 0.291  | 0.11    | 0.067  | 0.065     |

SEM = standard error of the means;  $n = 10$  for each group; Means are significantly different with  $p < 0.05$ .

**Supplemental Table S5.** Effects of sodium butyrate supplementation on KEGG pathways (level 2) enriched in the intestinal microbiota in preweaning calves as analyzed using the PICRUSt program.

| Relative abundance, %                       | Supplementation level, g/d |                       |                       |                       | SEM    | <i>p</i> -value |        |           |
|---------------------------------------------|----------------------------|-----------------------|-----------------------|-----------------------|--------|-----------------|--------|-----------|
|                                             | 0                          | 4.4                   | 8.8                   | 17.6                  |        | ANOVA           | Linear | Quadratic |
| Carbohydrate metabolism                     | 11.2887                    | 10.7493               | 11.1347               | 11.0797               | 0.1890 | 0.25            | 0.55   | 0.51      |
| Lipid metabolism                            | 2.01594                    | 2.12666               | 2.0929                | 2.11549               | 0.0439 | 0.29            | 0.33   | 0.34      |
| Metabolism of cofactors and vitamins        | 3.21033                    | 3.19308               | 3.1283                | 3.22954               | 0.0592 | 0.65            | 0.96   | 0.96      |
| Energy metabolism                           | 3.55297                    | 3.52752               | 3.59671               | 3.54513               | 0.0402 | 0.66            | 0.77   | 0.65      |
| Amino acid metabolism                       | 5.7521                     | 5.8266                | 5.7964                | 5.665                 | 0.1087 | 0.74            | 0.40   | 0.43      |
| Nucleotide metabolism                       | 2.978 <sup>b</sup>         | 3.4172 <sup>a</sup>   | 3.0928 <sup>b</sup>   | 3.4892 <sup>a</sup>   | 0.0825 | <0.001          | 0.41   | 0.34      |
| Biosynthesis of other secondary metabolites | 1.30781                    | 1.29027               | 1.27129               | 1.26137               | 0.0285 | 0.67            | 0.32   | 0.34      |
| Metabolism of terpenoids and polyketides    | 0.75328 <sup>b</sup>       | 0.81462 <sup>a</sup>  | 0.79701 <sup>ab</sup> | 0.79061 <sup>ab</sup> | 0.0151 | 0.048           | 0.61   | 0.51      |
| Xenobiotics biodegradation and metabolism   | 1.05426 <sup>b</sup>       | 1.26039 <sup>a</sup>  | 1.2398 <sup>a</sup>   | 1.19724 <sup>a</sup>  | 0.0372 | 0.002           | 0.68   | 0.71      |
| Metabolism of other amino acids             | 1.06295 <sup>b</sup>       | 1.14133 <sup>a</sup>  | 1.13333 <sup>a</sup>  | 1.16288 <sup>a</sup>  | 0.0234 | 0.027           | 0.44   | 0.43      |
| Glycan biosynthesis and metabolism          | 1.24473                    | 1.20225               | 1.19423               | 1.24645               | 0.0340 | 0.59            | 0.83   | 0.81      |
| Translation                                 | 2.31769 <sup>b</sup>       | 2.59809 <sup>a</sup>  | 2.35064 <sup>b</sup>  | 2.65163 <sup>a</sup>  | 0.0651 | 0.001           | 0.64   | 0.72      |
| Chemical structure transformation maps      | 1.24E-04                   | 2.55E-04              | 5.53E-04              | 6.55E-05              | 0.0002 | 0.39            | 0.29   | 0.32      |
| Global and overview maps                    | 36.7537                    | 36.5826               | 36.5127               | 36.2561               | 0.1859 | 0.31            | 0.76   | 0.79      |
| Drug resistance: Antimicrobial              | 1.17203                    | 1.22099               | 1.20699               | 1.2229                | 0.0286 | 0.57            | 0.90   | 0.94      |
| Drug resistance: Antineoplastic             | 0.20869 <sup>c</sup>       | 0.23828 <sup>ab</sup> | 0.22047 <sup>bc</sup> | 0.25694 <sup>a</sup>  | 0.0091 | 0.004           | 0.75   | 0.75      |
| Membrane transport                          | 9.4626                     | 8.9311                | 9.2064                | 9.2025                | 0.1481 | 0.11            | 0.78   | 0.81      |
| Signal transduction                         | 4.7445                     | 4.438                 | 4.798                 | 4.5167                | 0.1881 | 0.47            | 0.11   | 0.12      |
| Cellular community - prokaryotes            | 4.1684 <sup>a</sup>        | 3.9531 <sup>ab</sup>  | 4.1253 <sup>a</sup>   | 3.6956 <sup>b</sup>   | 0.1056 | 0.013           | 0.33   | 0.36      |
| Cell motility                               | 0.24463 <sup>ab</sup>      | 0.1959 <sup>ab</sup>  | 0.2858 <sup>a</sup>   | 0.16215 <sup>b</sup>  | 0.0319 | 0.048           | 0.76   | 0.75      |
| Folding, sorting and degradation            | 1.23432                    | 1.29694               | 1.22712               | 1.2988                | 0.0309 | 0.21            | 0.32   | 0.37      |
| Transcription                               | 0.151819 <sup>b</sup>      | 0.179222 <sup>a</sup> | 0.158838 <sup>b</sup> | 0.193429 <sup>a</sup> | 0.0061 | <.0001          | 0.43   | 0.43      |
| Replication and repair                      | 2.14779 <sup>b</sup>       | 2.42651 <sup>a</sup>  | 2.20949 <sup>b</sup>  | 2.5207 <sup>a</sup>   | 0.0532 | <0.001          | 0.86   | 0.89      |
| Endocrine system                            | 0.42943 <sup>b</sup>       | 0.50287 <sup>a</sup>  | 0.44593 <sup>b</sup>  | 0.4882 <sup>a</sup>   | 0.0146 | <0.001          | 0.33   | 0.36      |
| Signaling molecules and interaction         | 0.00158                    | 0.000302              | 0.00127               | 0.0002                | 0.0005 | 0.12            | 0.49   | 0.56      |
| Cell growth and death                       | 0.75388 <sup>a</sup>       | 0.69414 <sup>ab</sup> | 0.70409 <sup>ab</sup> | 0.64226 <sup>b</sup>  | 0.0214 | 0.008           | 0.77   | 0.81      |
| Transport and catabolism                    | 0.2103 <sup>a</sup>        | 0.1732 <sup>ab</sup>  | 0.18377 <sup>a</sup>  | 0.14591 <sup>b</sup>  | 0.0124 | 0.008           | 0.26   | 0.81      |
| Aging                                       | 0.195262                   | 0.209379              | 0.19834               | 0.210167              | 0.0058 | 0.18            | 0.65   | 0.93      |
| Circulatory system                          | 0.005438 <sup>c</sup>      | 0.023001 <sup>a</sup> | 0.014762 <sup>b</sup> | 0.028521 <sup>a</sup> | 0.0028 | <0.001          | 0.06   | 0.47      |

|                                  |                       |                        |                        |                        |        |        |       |       |
|----------------------------------|-----------------------|------------------------|------------------------|------------------------|--------|--------|-------|-------|
| Development                      | 0.00019161            | 0.00005114             | 0.00014271             | 0.0000115              | 0.0001 | 0.27   | 0.64  | 0.95  |
| Cellular community - eukaryotes  |                       |                        |                        |                        |        |        |       |       |
| Immune system                    | 0.131534 <sup>a</sup> | 0.109318 <sup>bc</sup> | 0.12273 <sup>ab</sup>  | 0.105969 <sup>c</sup>  | 0.0048 | 0.002  | 0.23  | 0.63  |
| Environmental adaptation         | 0.104089              | 0.104745               | 0.099976               | 0.088539               | 0.0047 | 0.074  | 0.96  | 0.42  |
| Nervous system                   | 0.13011 <sup>b</sup>  | 0.144048 <sup>a</sup>  | 0.132623 <sup>ab</sup> | 0.144021 <sup>a</sup>  | 0.0045 | 0.057  | 0.60  | 0.91  |
| Endocrine and metabolic diseases | 0.163618              | 0.171668               | 0.163524               | 0.165829               | 0.0038 | 0.41   | 0.71  | 0.68  |
| Excretory system                 | 0.01666 <sup>c</sup>  | 0.052966 <sup>a</sup>  | 0.036332 <sup>b</sup>  | 0.063074 <sup>a</sup>  | 0.0054 | <0.001 | 0.043 | 0.37  |
| Digestive system                 | 0.05735 <sup>b</sup>  | 0.11933 <sup>a</sup>   | 0.08057 <sup>b</sup>   | 0.12429 <sup>a</sup>   | 0.0121 | <0.001 | 0.20  | 0.56  |
| Neurodegenerative diseases       | 0.03678               | 0.04318                | 0.046634               | 0.036372               | 0.0039 | 0.2    | 0.048 | 0.033 |
| Substance dependence             | 0.00822               | 0.011831               | 0.007427               | 0.006385               | 0.0036 | 0.73   | 0.85  | 0.70  |
| Infectious diseases: Bacterial   | 0.37994               | 0.40212                | 0.40442                | 0.3886                 | 0.0092 | 0.21   | 0.04  | 0.04  |
| Infectious diseases: Parasitic   | 0.007624              | 0.011739               | 0.009256               | 0.008585               | 0.0026 | 0.72   | 0.48  | 0.45  |
| Infectious diseases: Viral       | 0.07194               | 0.06127                | 0.05768                | 0.04358                | 0.0091 | 0.19   | 0.46  | 0.89  |
| Cancers: Overview                | 0.28843 <sup>b</sup>  | 0.3475 <sup>a</sup>    | 0.31669 <sup>ab</sup>  | 0.34781 <sup>a</sup>   | 0.0108 | <0.001 | 0.078 | 0.28  |
| Cancers: Specific types          | 0.04494 <sup>b</sup>  | 0.0588 <sup>a</sup>    | 0.054305 <sup>ab</sup> | 0.054208 <sup>ab</sup> | 0.0028 | 0.011  | 0.053 | 0.057 |
| Immune diseases                  | 0.02891 <sup>c</sup>  | 0.039889 <sup>ab</sup> | 0.031927 <sup>bc</sup> | 0.046504 <sup>a</sup>  | 0.0034 | 0.003  | 0.69  | 0.66  |
| Cardiovascular diseases          | 0.106367              | 0.108545               | 0.107697               | 0.100814               | 0.0061 | 0.81   | 0.70  | 0.53  |

SEM = standard error of the means;  $n = 10$  for each group; Means within row with the different lowercase letters superscripts are significantly different ( $p < 0.05$ ). "—": not detected.

**Supplemental Table S6.** Relationship of growth-related indices of calves and indices of the intestinal microbiota.

| Items | <i>Bacteroidota</i> | <i>Lactobacillus</i> | <i>Norank_f__Muribaculaceae</i> | <i>Rikenellaceae_RC9_gut_group</i> | <i>Norank_f__Eubacterium_coprostanoligenes_group</i> | <i>Lachnoclostridium</i> | <i>Ruminococcus</i> | <i>Romboutsia</i> | <i>Lachnospiraceae_NK4A136_group</i> | <i>Erysipelotrichaceae_UCG-003</i> | <i>Olsenella</i> | Shannon index |
|-------|---------------------|----------------------|---------------------------------|------------------------------------|------------------------------------------------------|--------------------------|---------------------|-------------------|--------------------------------------|------------------------------------|------------------|---------------|
| BW    | 0.330*              | 0.142                | 0.318*                          | 0.299                              | 0.098                                                | -0.135                   | 0.267               | -0.088            | 0.089                                | 0.040                              | 0.050            | 0.367*        |
| ADG   | 0.234               | -0.164               | 0.291                           | 0.295                              | 0.204                                                | 0.020                    | 0.345*              | 0.072             | 0.306                                | -0.197                             | 0.192            | 0.577*        |
| FDMI  | 0.290               | -0.552*              | 0.183                           | 0.402*                             | 0.199                                                | 0.307                    | 0.080               | -0.113            | -0.142                               | -0.388*                            | -0.012           | -0.127        |
| FE    | 0.218               | -0.299               | -0.041                          | 0.008                              | 0.154                                                | 0.087                    | -0.056              | -0.029            | -0.201                               | -0.208                             | -0.026           | -0.026        |

\*  $p < 0.05$ ; BW: body weight; ADG: average daily gain; DMI: dry matter intake; FE: feed efficiency. The correlation using Spearman’s rank correlation coefficient and 2–tailed significance test ( $n = 40$ ).

**A<sub>1</sub>**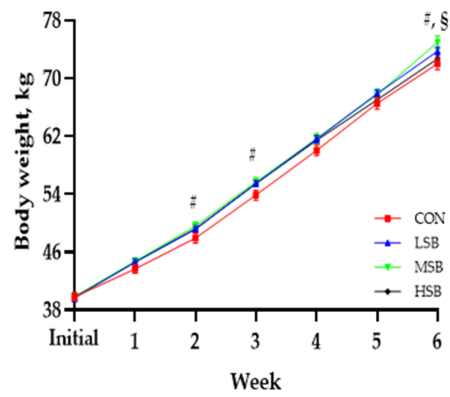**B<sub>1</sub>**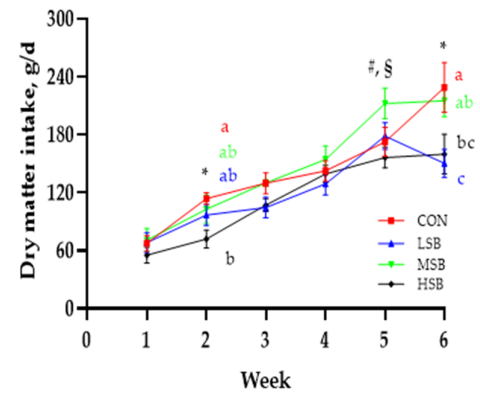**C<sub>1</sub>**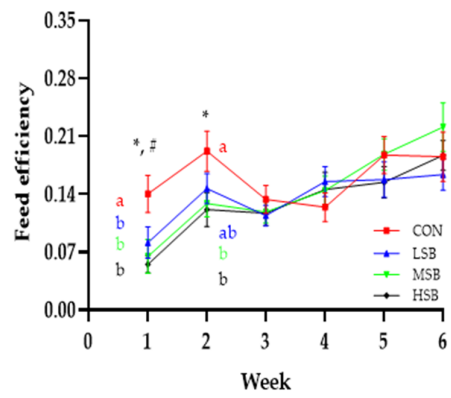



**D**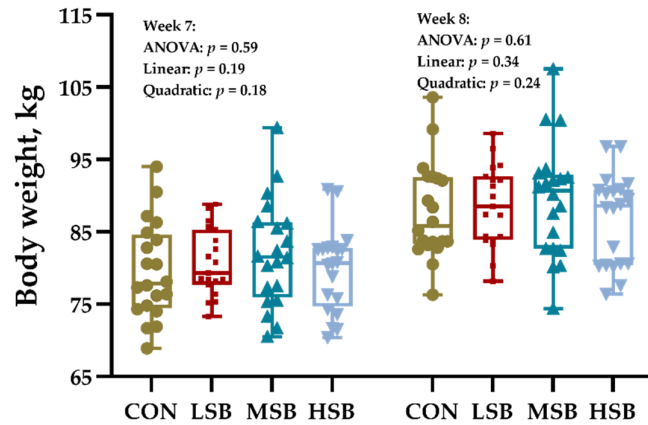**E**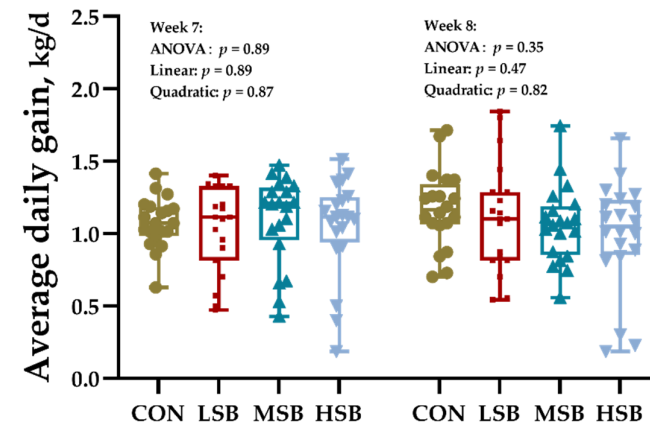

**Supplemental Figure S1.** Growth performance of preweaning calves in each week and the body weight and average daily gain of calves at 46–59 d of age (weeks 7 and 8; weaning transition period). CON = treatment consisted of milk without SB supplementation for calves (0 g/d), LSB = treatment consisted of milk with a low level of SB supplementation for calves (4.4 g/d), MSB = treatment consisted of milk with a medium level of SB supplementation for calves (8.8 g/d), and HSB = treatment consisted of milk with a high level of SB supplementation for calves (17.6 g/d). All the results are shown as the mean  $\pm$  SEM,  $n = 20$  ( $n = 19$  for the LSB group at week 4 and thereafter). FE was calculated by DMI/ADG. The four treatments are shown with ANOVA (\*  $p < 0.05$ ; \*\*  $p < 0.01$ ), linear (#  $p < 0.05$ ; ##  $p < 0.01$ ), and quadratic effects (§  $p < 0.05$ ; §§  $p < 0.01$ ) at the same time period (week), and different lowercase letters for different treatments at the same time period are shown when significantly different ( $p < 0.05$ ).

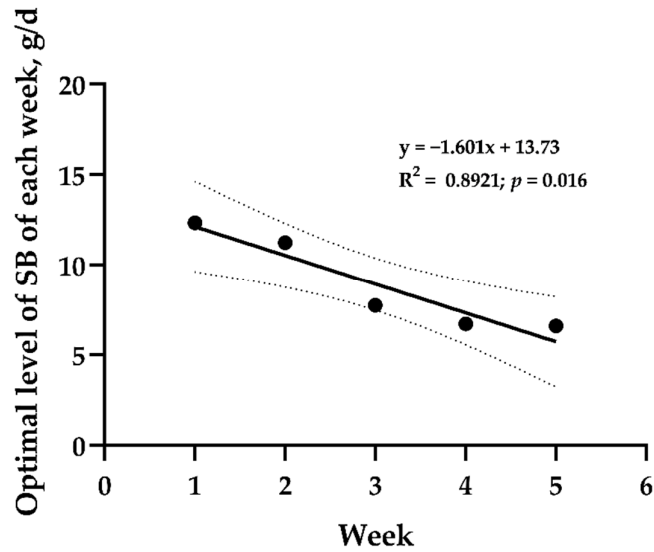

**Figure S2.** Result of regression analysis for the obtained optimal sodium butyrate supplementation level for each week. CON = treatment consisted of milk without SB supplementation for calves (0 g/d), LSB = treatment consisted of milk with a low level of SB supplementation for calves (4.4 g/d), MSB = treatment consisted of milk with a medium level of SB supplementation for calves (8.8 g/d), and HSB = treatment consisted of milk with a high level of SB supplementation for calves (17.6 g/d). Using second-order polynomial regression (quadratic) equations on ADG for each week, and the optimal SB supplementation level were 12.33, 11.24, 7.74, 6.71, and 6.59 for 1st, 2nd, 3rd, 4th, and 5th weeks.

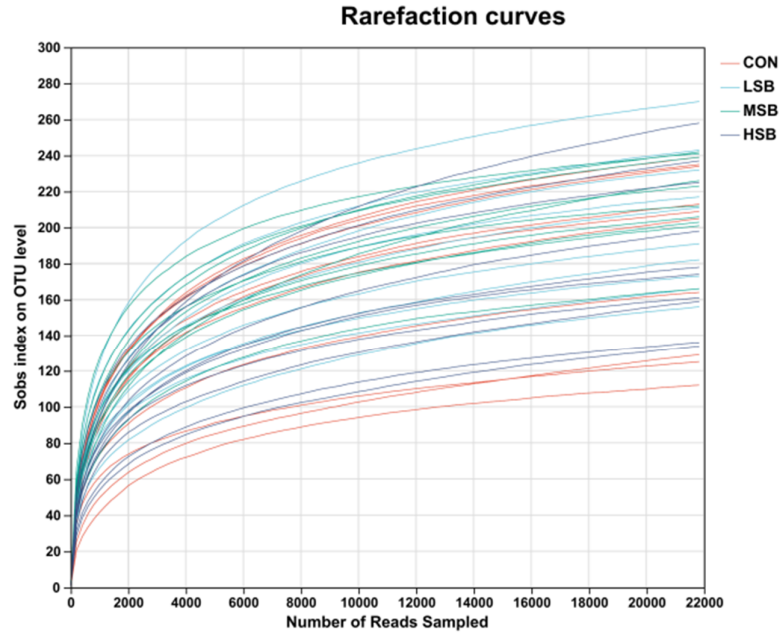

**Figure S3.** Effects of sodium butyrate supplementation on rarefaction curves of the intestinal microbiota in preweaning calves. CON = treatment consisted of milk without SB supplementation for calves (0 g/d), LSB = treatment consisted of milk with a low level of SB supplementation for calves (4.4 g/d), MSB = treatment consisted of milk with a medium level of SB supplementation for calves (8.8 g/d), and HSB = treatment consisted of milk with a high level of SB supplementation for calves (17.6 g/d).

**A**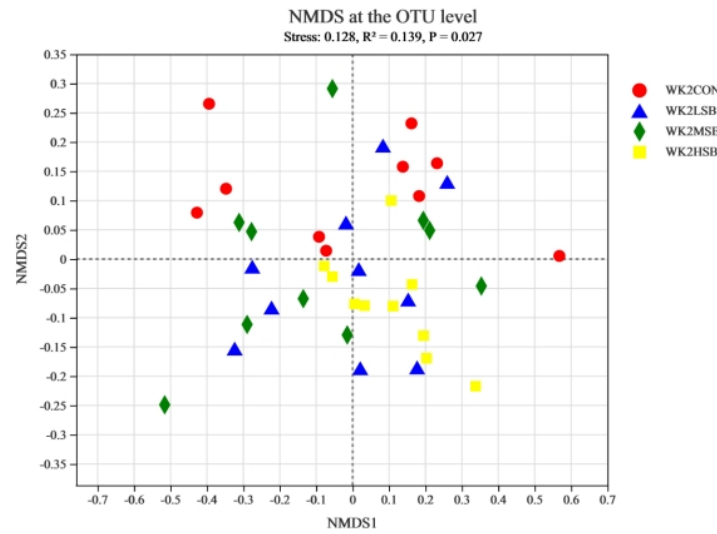**B**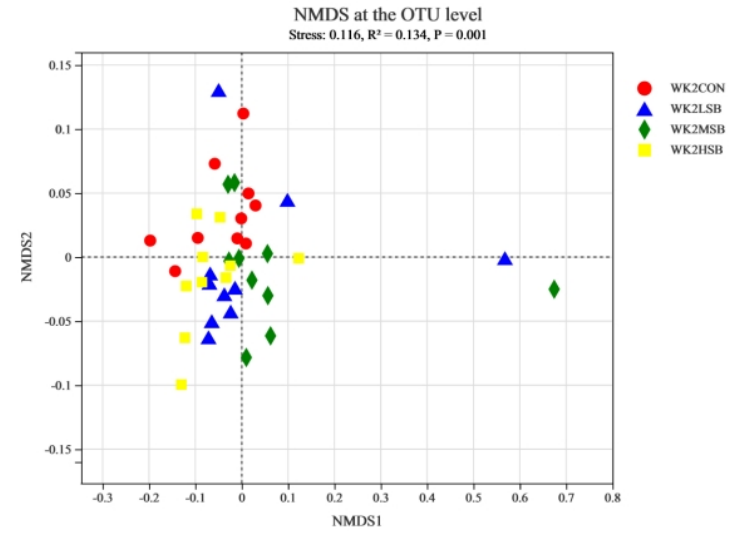

**Figure S4.** Effects of sodium butyrate supplementation on beta diversity of the intestinal microbiota in preweaning calves. Beta diversity measures using NMDS for the intestinal microbiota communities and NMDS plot based on community membership as measured by the weighted UniFrac distances (**A**) and unweighted UniFrac distances (**B**) followed by the Adonis test at the OTU level. CON = treatment consisted of milk without SB supplementation for calves (0 g/d), LSB = treatment consisted of milk with a low level of SB supplementation for calves (4.4 g/d), MSB = treatment consisted of milk with a medium level of SB supplementation for calves (8.8 g/d), and HSB = treatment consisted of milk with a high level of SB supplementation for calves (17.6 g/d).  $n = 10$  for each group.

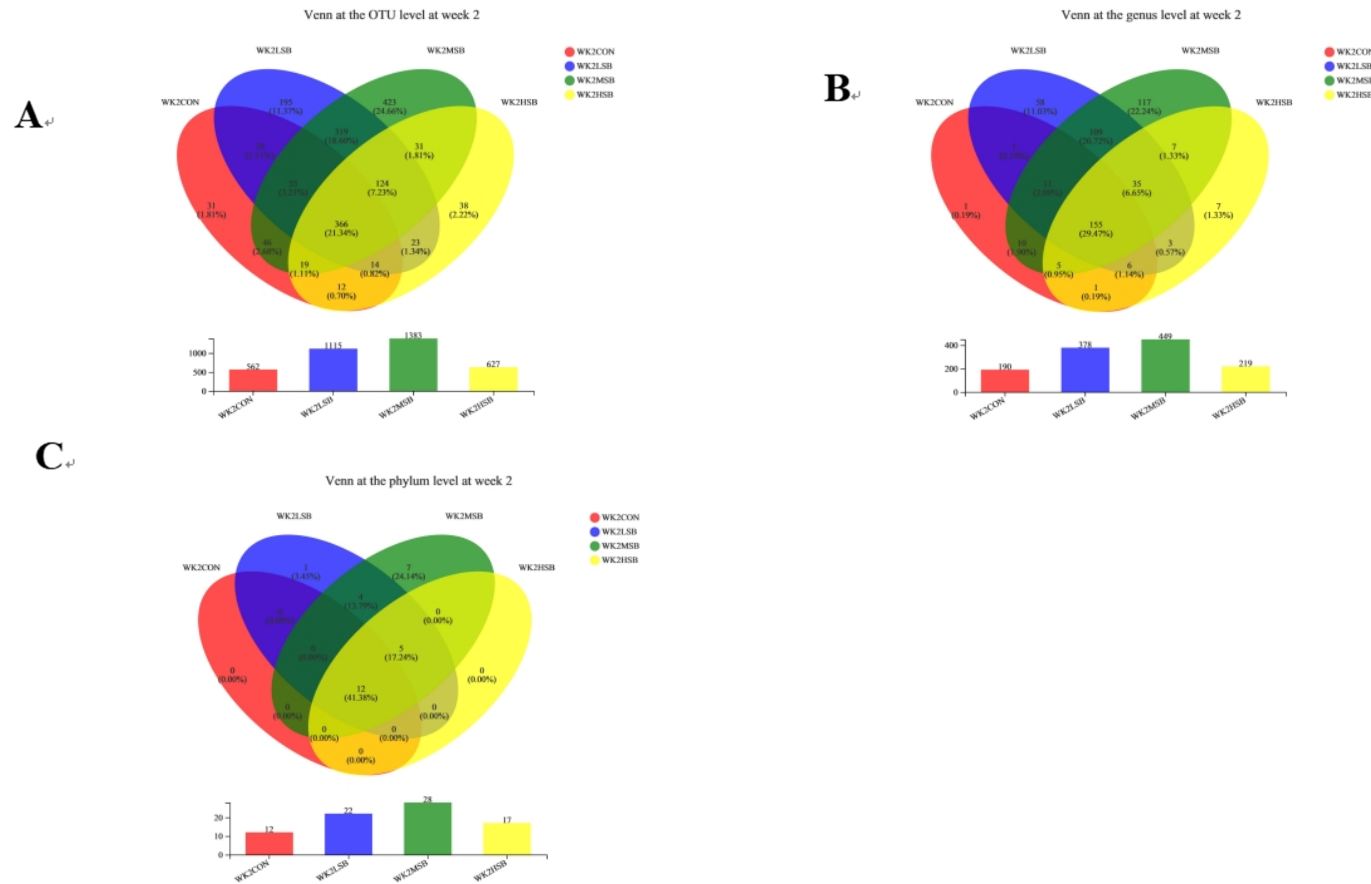

**Figure S5.** Venn diagram of the common and distinct taxa at the phylum, genus, and OTU levels among the four groups of preweaning calves. Venn's diagram at the OTU (A), genus (B), and phylum (C) levels. CON = treatment consisted of milk without SB supplementation for calves (0 g/d), LSB = treatment consisted of milk with a low level of SB supplementation for calves (4.4 g/d), MSB = treatment consisted of milk with a medium level of SB supplementation for calves (8.8 g/d), and HSB = treatment consisted of milk with a high level of SB supplementation for calves (17.6 g/d).  $n = 10$  for each group.
